# Supplementary material for: Identification and screening of plant hormone-related genes involved in the release of peach seed dormancy through multi-omics analysis
Source: Research Square preprint supplement (doi:10.21203/rs.3.rs-7952590/v1), 2025-11-11
Supplement: Supplementary file 1 [file 9d3e65da0f6b5438f4b84eeb.xlsx]

## Sheet: All.sample.summary
Table S1. Statistics of transcriptome data quality of each sample
Sample	Group	Raw Reads	Clean Reads	Clean Base(G)	Error Rate(%)	Q20(%)	Q30(%)	GC Content(%)
CK1-1	CK1	62056308	58469148	8.77	0.02	95.71	88.08	46.24
CK1-2	CK1	51880610	47132348	7.07	0.02	95.71	88.09	46.2
CK1-3	CK1	49623624	44529570	6.68	0.02	95.56	87.61	46.23
CK-1	CK	45507746	42973910	6.45	0.02	95.89	88.52	45.84
CK-2	CK	41277342	38138862	5.72	0.02	95.84	88.37	45.8
CK-3	CK	49969030	43045864	6.46	0.02	96.33	89.68	45.99
T1-1	T1	44889480	40264228	6.04	0.02	95.84	88.44	45.54
T1-2	T1	53303200	47587202	7.14	0.02	95.88	88.41	45.44
T1-3	T1	47569800	42532286	6.38	0.02	96.12	89.17	44.98
T2-1	T2	61139498	55207380	8.28	0.02	96.03	88.86	45.55
T2-2	T2	62141354	57654486	8.65	0.02	95.98	88.68	45.77
T2-3	T2	54858292	48441456	7.27	0.02	96.05	89.1	45.76
T3-1	T3	59189290	53225202	7.98	0.02	95.84	88.41	45.74
T3-2	T3	57848266	52276876	7.84	0.02	95.8	88.25	45.54
T3-3	T3	67403618	61974860	9.3	0.02	95.87	88.53	45.59
